# Supplementary material for: 1H NMR global diatropicity in copper hydride complexes
Source: Royal Society of Chemistry journal article supplement (doi:10.1039/d2nr02415b), 2022-01-01
Supplement: d2nr02415b1.pdf [file d2nr02415b1.pdf]

# Supporting information for: $^1\text{H}$ NMR Global Diatropicity in Copper Hydride Complexes

Omar López-Estrada,<sup>†,‡</sup> Jorge L. Torres-Moreno,<sup>‡</sup> Bernardo Zuniga-Gutierrez,<sup>¶</sup>  
Patrizia Calaminici,<sup>‡</sup> Sami Malola,<sup>†</sup> Andreas M. Köster,<sup>‡</sup> and Hannu  
Häkkinen<sup>\*,†,§</sup>

<sup>†</sup>*Department of Physics, Nanoscience Center, University of Jyväskylä, FI-40014 Jyväskylä,  
Finland*

<sup>‡</sup>*Departamento de Química, Cinvestav, Av. Instituto Politécnico Nacional, 2508, A.P.  
14740, Ciudad de México 07000, Mexico*

<sup>¶</sup>*Departamento de Química, Universidad de Guadalajara, CUCEI, Blvd. Marcelino García  
Barragán 1421, C. P. 44430 Guadalajara, Jalisco, Mexico*

<sup>§</sup>*Department of Chemistry, Nanoscience Center, University of Jyväskylä, FI-40014  
Jyväskylä, Finland*

E-mail: hannu.j.hakkinen@jyu.fi

## Supplementary Tables

Table SI-1. Experimental Cu- $\mu_3$ -H distances ( $d_n$ ) on top and bottom of the triangular cupola, average distance and standard deviation in Å for the Cu<sub>20</sub> and Cu<sub>32</sub> clusters.

|                         | Top            | Cu1  | Cu2  | Cu3  | Average | STD  |  |
|-------------------------|----------------|------|------|------|---------|------|--|
| <b>Cu20<sup>a</sup></b> | d <sub>1</sub> | 1.62 | 1.58 | 1.63 | 1.61    | 0.03 |  |
|                         | d <sub>2</sub> | 1.69 | 1.70 | 1.70 | 1.70    | 0.01 |  |
|                         | d <sub>3</sub> | 1.75 | 1.73 | 1.70 | 1.73    | 0.02 |  |
|                         | Bottom         |      |      |      |         |      |  |
|                         | d <sub>1</sub> | 1.64 | 1.59 | 1.54 | 1.59    | 0.05 |  |
|                         | d <sub>2</sub> | 1.75 | 1.75 | 1.73 | 1.75    | 0.01 |  |
| d <sub>3</sub>          | 1.77           | 1.81 | 1.80 | 1.79 | 0.02    |      |  |
| <hr/>                   |                |      |      |      |         |      |  |
|                         | Top            |      |      |      |         |      |  |
| <b>Cu32<sup>b</sup></b> | d <sub>1</sub> | 1.65 | 1.58 | 1.66 | 1.63    | 0.04 |  |
|                         | d <sub>2</sub> | 1.73 | 1.75 | 1.68 | 1.72    | 0.04 |  |
|                         | d <sub>3</sub> | 1.77 | 1.87 | 1.71 | 1.78    | 0.08 |  |
|                         | Bottom         |      |      |      |         |      |  |
|                         | d <sub>1</sub> | 1.65 | 1.58 | 1.66 | 1.63    | 0.04 |  |
|                         | d <sub>2</sub> | 1.73 | 1.75 | 1.68 | 1.72    | 0.04 |  |
| d <sub>3</sub>          | 1.77           | 1.87 | 1.71 | 1.78 | 0.08    |      |  |

<sup>a</sup> Ref.<sup>1</sup> <sup>b</sup> Ref.<sup>2</sup> .

## Supplementary Figures

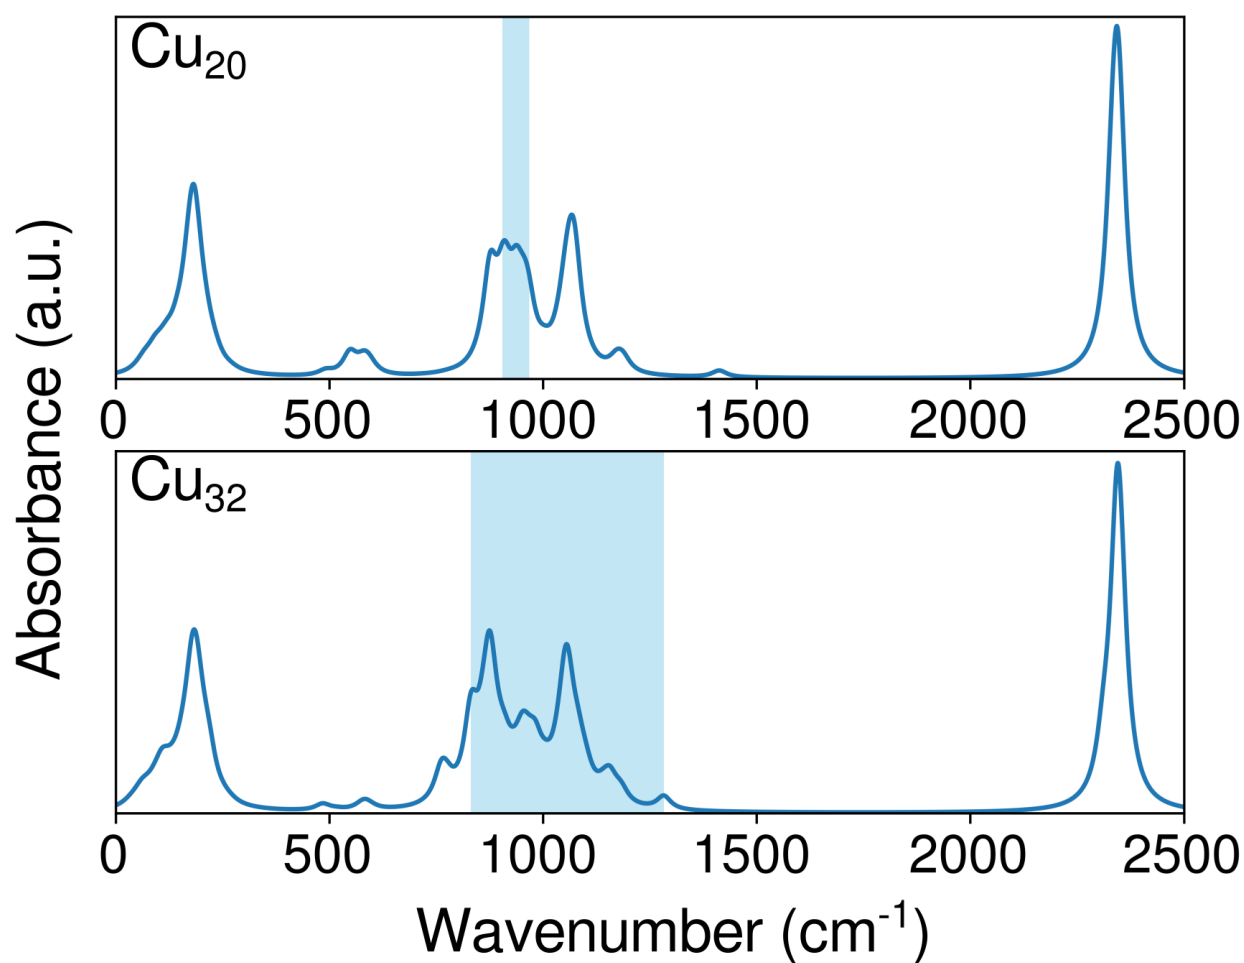

**Fig. SI-1.** IR spectra for  $\text{Cu}_{20}\text{H}_{11}(\text{S}_2\text{PH}_2)_9$  (top row) and  $\text{Cu}_{32}\text{H}_{20}(\text{S}_2\text{PH}_2)_{12}$  (bottom row). The blue shadow area indicates the range of the hydrides normal modes.

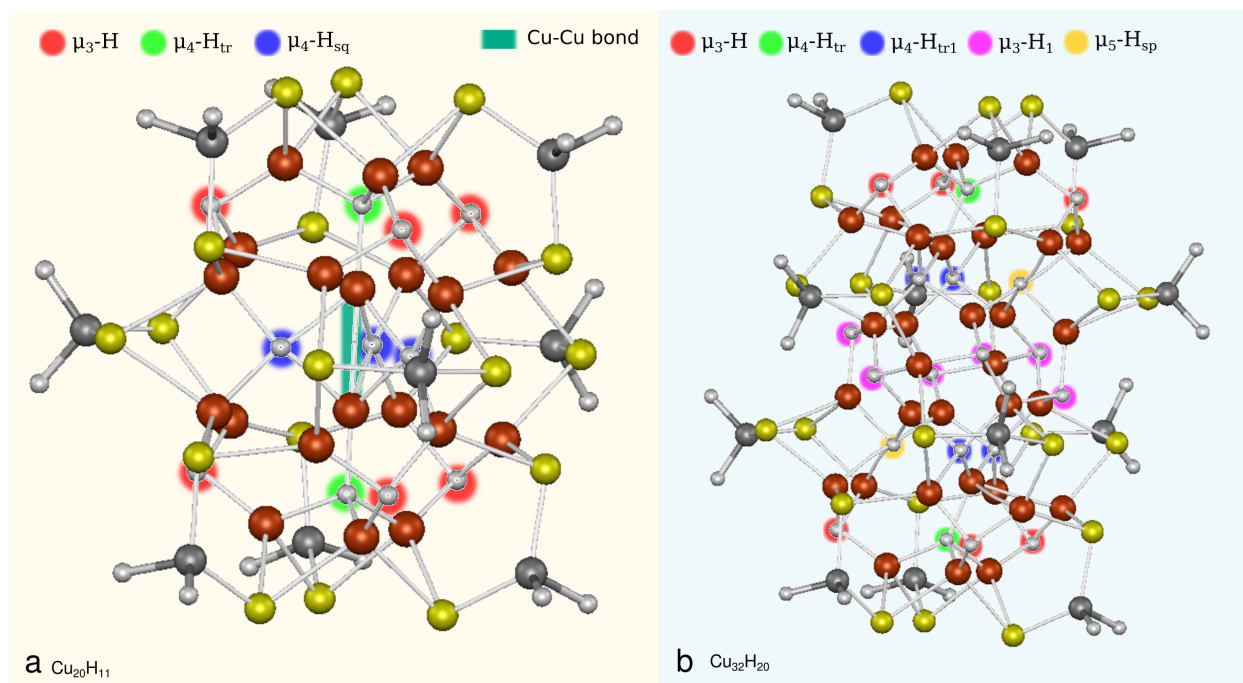

**Fig. SI-2.** Molecular graphs of **1** (left) and **2** (right). Bond path analyses shows that Cu-Cu bonds are absent with the exception of a Cu-Cu dimer at the centre of **1**. The different hydrides are highlighted.

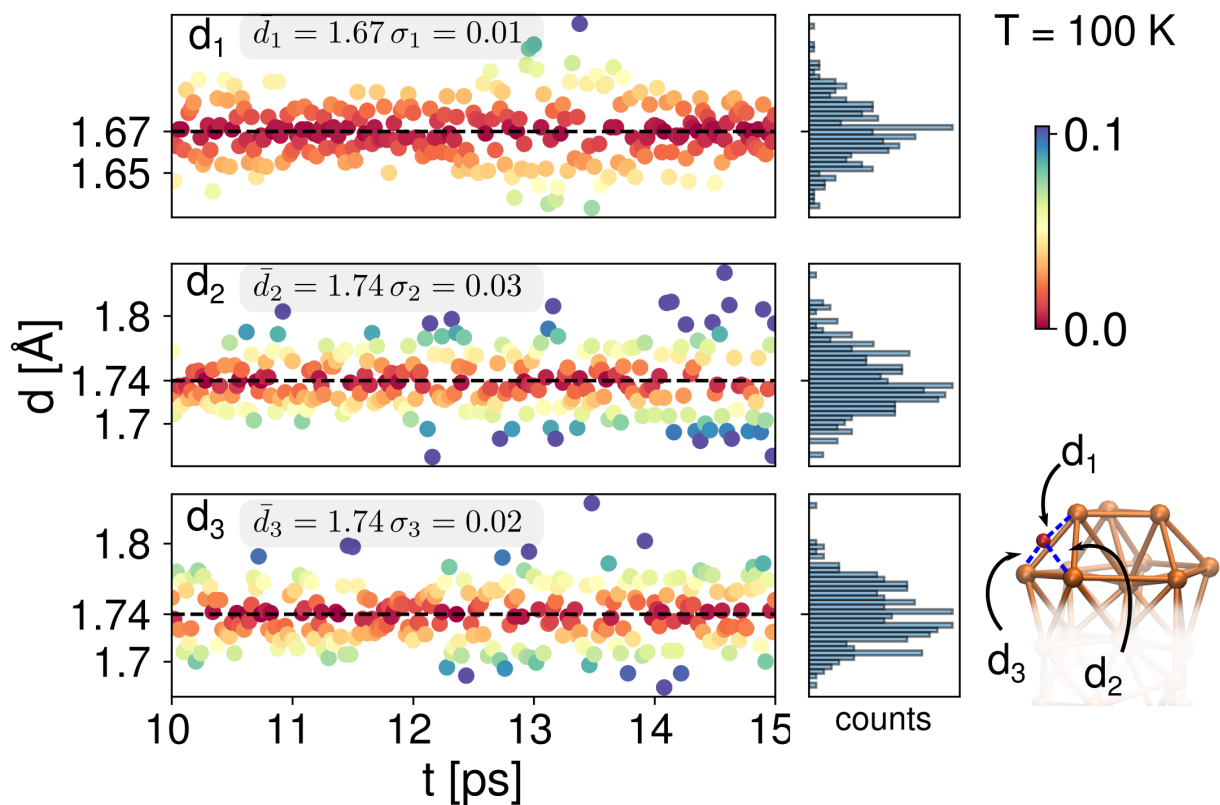

**Fig. SI-3.** Bond lengths analysis between the  $\mu_3$ -H hydride and the three coordinated neighbor Cu atoms for the BOMD trajectory during 10 –15 ps for the cluster **2** at 100 K.

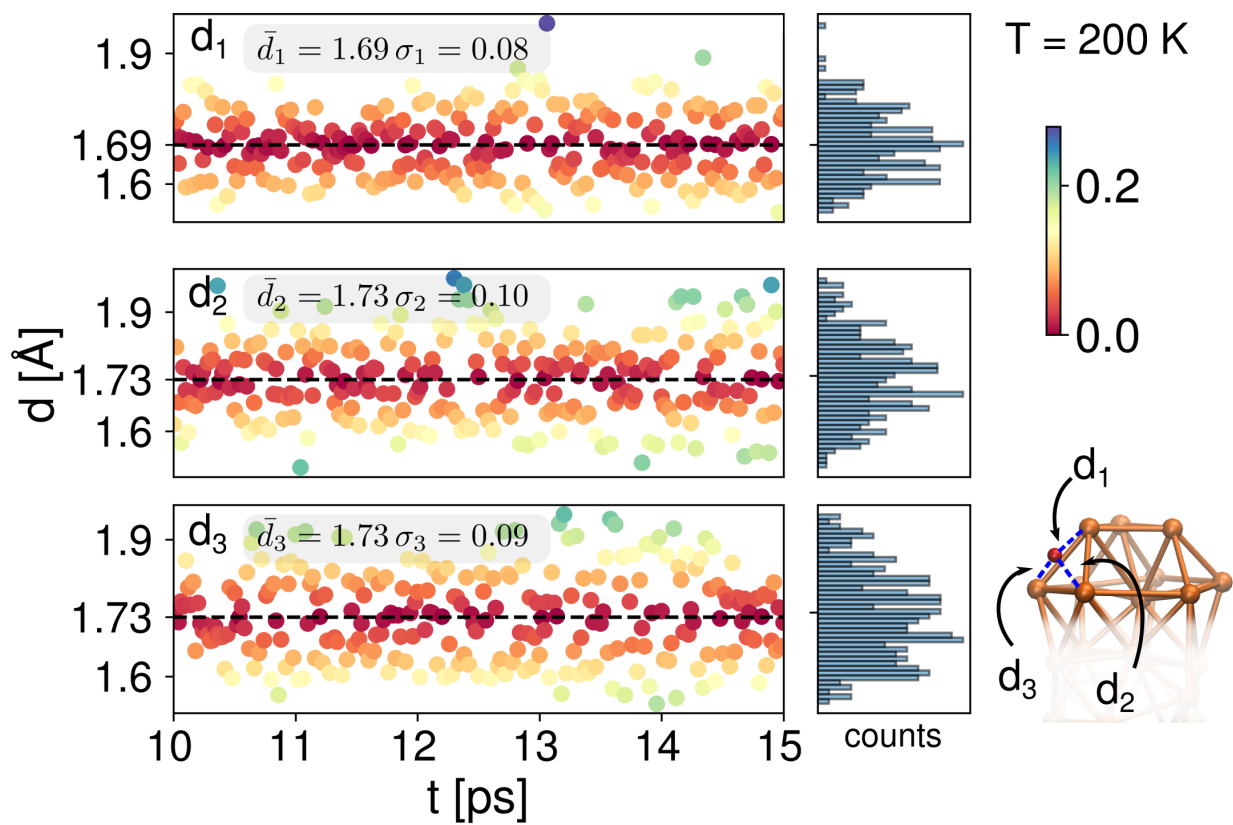

**Fig. SI-4.** Bond lengths analysis between the  $\mu_3$ -H hydride and the three coordinated neighbor Cu atoms for the BOMD trajectory during 10–15 ps for the cluster **2** at 200 K.

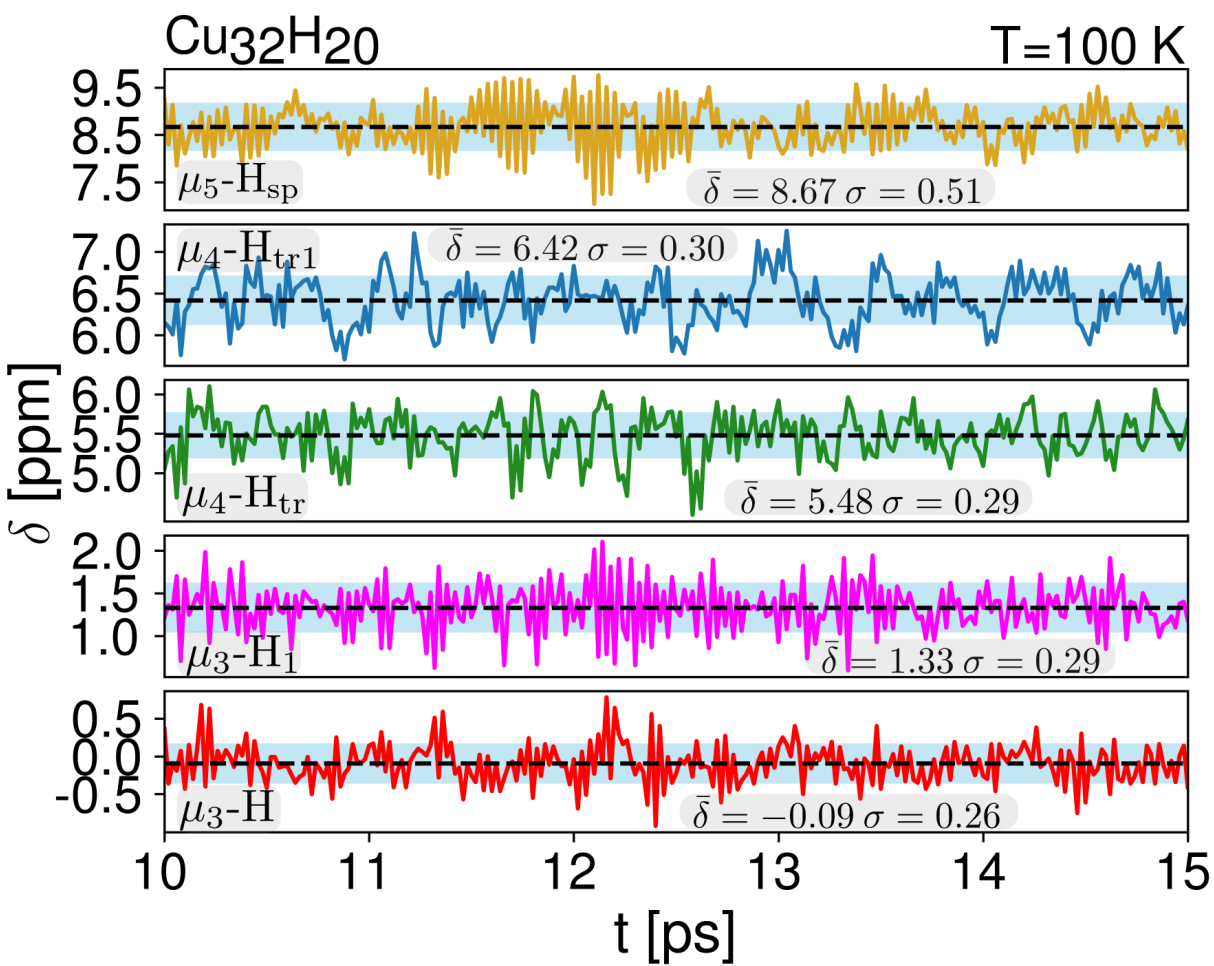

**Fig. SI-5.** <sup>1</sup>H NMR dynamics of one sample of each of the  $\mu_3\text{-H}$ ,  $\mu_3\text{-H}_1$ ,  $\mu_4\text{-H}_{tr}$ ,  $\mu_4\text{-H}_{tr1}$  and  $\mu_5\text{-H}_{sp}$  hydride types for cluster **2** during 10 – 15 ps at 100 K. The average shifts are given by the dashed lines while the standard deviations are shown with the blue shading.

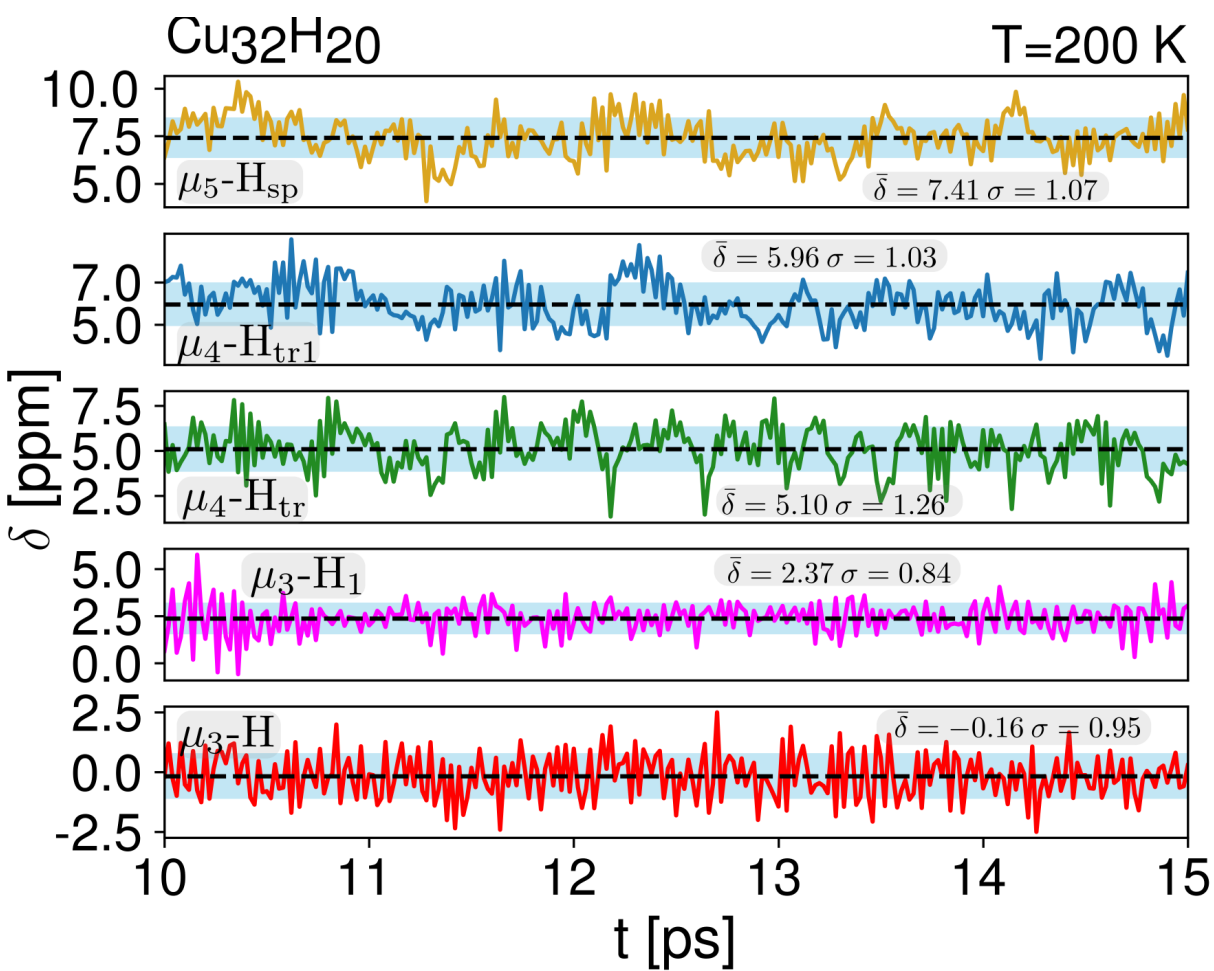

**Fig. SI-6.**  $^1\text{H}$  NMR dynamics of one sample of each of the  $\mu_3\text{-H}$ ,  $\mu_3\text{-H}_1$ ,  $\mu_4\text{-H}_{tr}$ ,  $\mu_4\text{-H}_{tr1}$  and  $\mu_5\text{-H}_{sp}$  hydride types for cluster **2** during 10 – 15 ps at 200 K. The average shifts are given by the dashed lines while the standard deviations are shown with the blue shading.



## References

- (1) Dhayal, R. S.; Liao, J.-H.; Lin, Y.-R.; Liao, P.-K.; Kahlal, S.; Saillard, J.-Y.; Liu, C. W. A Nanospheric Polyhydrido Copper Cluster of Elongated Triangular Orthobicupola Array: Liberation of H<sub>2</sub> from Solar Energy. *Journal of the American Chemical Society* **2013**, *135*, 4704–4707.
- (2) Dhayal, R. S.; Liao, J.-H.; Kahlal, S.; Wang, X.; Liu, Y.-C.; Chiang, M.-H.; vanZyl, W. E.; Saillard, J.-Y.; Liu, C. W. [Cu<sub>32</sub>(H)<sub>20</sub>S<sub>2</sub>P(OiPr)<sub>212</sub>]: The Largest Number of Hydrides Recorded in a Molecular Nanocluster by Neutron Diffraction. *Chemistry – A European Journal* **2015**, *21*, 8369–8374.
